# Supplementary material
Source: PubMed Central journal article supplement (PMC6459051)
Supplement: jamaoncol-e186752-s002.pdf [file jamaoncol-e186752-s002.pdf]

## Supplementary Online Content

Bruner DW, Pugh SL, Lee WR, et al. Quality of life in patients with low-risk prostate cancer treated with hypofractionated vs conventional radiotherapy: a phase 3 randomized clinical trial. *JAMA Oncol*. Published online February 14, 2019. doi:10.1001/jamaoncol.2018.6752

**eTable.** Significant patient and tumor characteristics by EPIC completion status at 6, 12, 24, and 60 months

This supplementary material has been provided by the authors to give readers additional information about their work.

**eTable 1. Significant Patient and Tumor Characteristics by EPIC Completion Status at 6, 12, 24, and 60 Months**

|                                       | Missing<br>Assessment | Complete<br>Assessment | P-value |
|---------------------------------------|-----------------------|------------------------|---------|
| 6 Months                              | (n=261)               | (n=701)                |         |
| RT Modality (received)                |                       |                        |         |
| 3D-CRT                                | 67 (26.5%)            | 115 (16.5%)            | 0.0007  |
| IMRT                                  | 186 (73.5%)           | 584 (83.5%)            |         |
| Planned RT Modality (at registration) |                       |                        |         |
| 3D-CRT                                | 73 (28.0%)            | 123 (17.5%)            | 0.0006  |
| IMRT                                  | 188 (72.0%)           | 578 (82.5%)            |         |
| 12 months                             | (n=327)               | (n=635)                |         |
| Age (years)                           |                       |                        |         |
| ≤65                                   | 166 (50.8%)           | 250 (39.4%)            | 0.0008  |
| >65                                   | 161 (49.2%)           | 385 (60.6%)            |         |
| Planned RT Modality (at registration) |                       |                        |         |
| 3D-CRT                                | 81 (24.8%)            | 115 (18.1%)            | 0.018   |

**eTable 1. Significant Patient and Tumor Characteristics by EPIC Completion Status at 6, 12, 24, and 60 Months**

|                                            | Missing<br>Assessment | Complete<br>Assessment | P-value |
|--------------------------------------------|-----------------------|------------------------|---------|
| IMRT                                       | 246 (75.2%)           | 520 (81.9%)            |         |
| <hr/>                                      |                       |                        |         |
| 60 months                                  | (n=428)               | (n=534)                |         |
| Race                                       |                       |                        |         |
| Other                                      | 103 (24.1%)           | 86 (16.3%)             | 0.0032  |
| White                                      | 324 (75.9%)           | 441 (83.7%)            |         |
| Ethnicity                                  |                       |                        |         |
| Hispanic or Latino                         | 22 (5.4%)             | 7 (1.4%)               | 0.0010  |
| Not Hispanic or Latino                     | 384 (94.6%)           | 476 (98.6%)            |         |
| Planned RT Modality (at registration)      |                       |                        |         |
| 3D-CRT                                     | 73 (17.1%)            | 123 (23.0%)            | 0.024   |
| IMRT                                       | 355 (82.9%)           | 411 (77.0%)            |         |
| <hr/>                                      |                       |                        |         |
| P-value from two-sided Fisher's exact test |                       |                        |         |
