# Supplementary material
Source: PubMed Central journal article supplement (PMC6459051)
Supplement: jamaoncol-e186752-s003.pdf [file jamaoncol-e186752-s003.pdf]

## **Data Sharing Statement**

Bruner. Quality of Life in Patients With Low-Risk Prostate Cancer Treated With Hypofractionated vs Conventional Radiotherapy. *JAMA Oncol.* Published February 14, 2019. 10.1001/jamaoncol.2018.6752

### **Data**

**Data available:** No
